# Supplementary material
Source: PubMed Central journal article supplement (PMC9246888)
Supplement: NIHMS1798669-supplement-1.pdf [file NIHMS1798669-supplement-1.pdf]

**Supplementary Table 1.** YLL rates (per 100,000 males) for the 50-64, 65-74 and 75+ age groups at the start and the end of the trend period for the 54 selected countries

| Region                                 | Country             | Period    | 50-64 |        | 65-74  |        | 75+    |        |
|----------------------------------------|---------------------|-----------|-------|--------|--------|--------|--------|--------|
|                                        |                     |           | Start | End    | Start  | End    | Start  | End    |
| Africa                                 | Egypt               | 2000-2019 | 42.2  | 42.1   | 147.9  | 155.8  | 187.9  | 235.5  |
|                                        | Morocco             | 2000-2016 | 25.8  | 25     | 52.2   | 132.2  | 75.4   | 183.2  |
|                                        | South Africa        | 2000-2015 | 225.9 | 288.3  | 668.3  | 1108.8 | 1353.9 | 2089.1 |
| Asia                                   | Israel              | 2000-2018 | 172.4 | 92.8   | 729.3  | 490    | 1799.4 | 1292.3 |
|                                        | Japan               | 2000-2018 | 84.8  | 66     | 498.4  | 392.7  | 1078.4 | 1011.3 |
|                                        | Malaysia            | 2000-2014 | 32.4  | 46.6   | 97     | 185.8  | 107.6  | 322.6  |
|                                        | Republic of Korea   | 2000-2019 | 41.1  | 48.9   | 232.6  | 266.9  | 498.6  | 880    |
|                                        | Thailand            | 2000-2019 | 27.3  | 80.7   | 69.4   | 295    | 108.4  | 471.9  |
| <b>Europe</b>                          |                     |           |       |        |        |        |        |        |
| Europe - Eastern                       | Hungary             | 2000-2019 | 297.7 | 251.8  | 1185.4 | 1009.2 | 2322.7 | 1924.1 |
|                                        | Poland              | 2000-2018 | 252.1 | 308.4  | 1042.5 | 1306.3 | 1859.9 | 2547.9 |
|                                        | Republic of Moldova | 2000-2018 | 129   | 246.2  | 301.3  | 806.2  | 366.4  | 989.6  |
|                                        | Romania             | 2000-2018 | 170.5 | 215.1  | 686.4  | 943.7  | 1264.9 | 1604.7 |
|                                        | Slovakia            | 2000-2014 | 260.1 | 347.1  | 1080.9 | 1225.3 | 2224.1 | 2682.9 |
| Europe - Northern                      | Denmark             | 2000-2018 | 336.6 | 227.4  | 1791.6 | 1234.6 | 3111.4 | 2952.4 |
|                                        | Estonia             | 2000-2019 | 339.7 | 313.9  | 1427.9 | 2003.5 | 2619.4 | 2984.4 |
|                                        | Finland             | 2000-2018 | 298.7 | 252.8  | 1323.4 | 991.4  | 2717.9 | 2049.4 |
|                                        | Latvia              | 2000-2018 | 360.9 | 204.1  | 1154.4 | 1765.7 | 1672.1 | 3725.3 |
|                                        | Lithuania           | 2000-2019 | 347.3 | 391.5  | 1230.7 | 1465.3 | 2212.5 | 2778.9 |
|                                        | Norway              | 2000-2016 | 419.3 | 238.2  | 2096.1 | 1022.8 | 3556.5 | 2996.9 |
|                                        | Sweden              | 2000-2018 | 370.1 | 233.4  | 1918.2 | 1120.5 | 3804.8 | 2908   |
|                                        | United Kingdom      | 2001-2016 | 287.5 | 243.6  | 1253.7 | 1081   | 2564.3 | 2402.8 |
| Europe - Southern                      | Croatia             | 2000-2017 | 189.1 | 268.2  | 981.5  | 1041.8 | 2059.5 | 2407.2 |
|                                        | Italy               | 2003-2017 | 184.7 | 133    | 783.4  | 619    | 1916.4 | 1427.2 |
|                                        | Serbia              | 2000-2017 | 168.7 | 184    | 628.4  | 775.4  | 873.9  | 1387.5 |
|                                        | Slovenia            | 2000-2019 | 242   | 196.8  | 1304.5 | 1231.1 | 2581.8 | 2936.1 |
|                                        | Spain               | 2000-2017 | 203.8 | 162.2  | 934.8  | 713.4  | 2292.7 | 1715.7 |
| Europe - Western                       | Austria             | 2002-2019 | 275.8 | 177.3  | 1216.6 | 865.6  | 2457.6 | 1950.4 |
|                                        | Belgium             | 2000-2016 | 219.1 | 181.7  | 1024.5 | 829.8  | 2334.4 | 1772.5 |
|                                        | France              | 2000-2016 | 259.9 | 175.7  | 1201.3 | 778.5  | 2657.7 | 2029.7 |
|                                        | Germany             | 2000-2018 | 308   | 216.8  | 1105.4 | 1030.4 | 2420.9 | 2178.9 |
|                                        | Netherlands         | 2000-2018 | 255.1 | 197.6  | 1322.5 | 1096   | 2769.4 | 2427.4 |
|                                        | Switzerland         | 2000-2017 | 305.8 | 168.4  | 1457.4 | 987.5  | 3284.6 | 2415.4 |
| <b>Latin America and the Caribbean</b> |                     |           |       |        |        |        |        |        |
| Caribbean                              | Cuba                | 2001-2017 | 457.7 | 457.6  | 1976.4 | 2304   | 3737.7 | 4810.5 |
|                                        | Jamaica             | 2000-2014 | 738.9 | 607.9  | 3076.7 | 3090.1 | 5146.1 | 6018.2 |
|                                        | Martinique          | 2000-2016 | 478.4 | 549.3  | 2106.5 | 2061.6 | 6948.2 | 4005.4 |
|                                        | Puerto Rico         | 2000-2017 | 245.7 | 261    | 1171.7 | 1143   | 3305.9 | 2416.9 |
| Central America                        | Costa Rica          | 2000-2019 | 158.6 | 225.1  | 1430.9 | 878.3  | 3893.7 | 2579.1 |
|                                        | El Salvador         | 2000-2015 | 101   | 105.9  | 565.9  | 307.9  | 1083   | 757    |
|                                        | Mexico              | 2000-2017 | 223.2 | 186.1  | 1048.8 | 913.1  | 2141.5 | 1978.2 |
|                                        | Nicaragua           | 2000-2018 | 113.3 | 122.4  | 732.3  | 770.5  | 1498.5 | 1310.8 |
| South America                          | Panama              | 2000-2017 | 385.4 | 193.3  | 1561.1 | 1691.5 | 4285.6 | 2961.3 |
|                                        | Argentina           | 2000-2018 | 257.7 | 208.1  | 1232.2 | 1018.7 | 2532.8 | 1941.8 |
|                                        | Brazil              | 2000-2018 | 208.8 | 221.5  | 1025   | 1065.8 | 2093.5 | 2522.7 |
|                                        | Chile               | 2000-2018 | 203.9 | 246.3  | 1308.7 | 1290.8 | 3709   | 3080.7 |
|                                        | Colombia            | 2000-2017 | 265.2 | 207.7  | 1238   | 948.5  | 2712.7 | 2302.6 |
|                                        | Ecuador             | 2000-2017 | 232.4 | 171.9  | 1161.8 | 746.6  | 2418.9 | 2148.9 |
|                                        | Paraguay            | 2000-2017 | 157.4 | 267.9  | 908.5  | 950.1  | 1753.1 | 2161.5 |
|                                        | Peru                | 2000-2017 | 144.1 | 119.6  | 859.1  | 579.5  | 1771.5 | 1547.4 |
|                                        | Uruguay             | 2000-2017 | 425   | 195.6  | 1395.5 | 1324.7 | 3448.3 | 3071.5 |
| Venezuela                              | 2000-2014           | 293.3     | 353.9 | 1626.2 | 1460.8 | 3370.4 | 3749.6 |        |
| Northern America                       | Canada              | 2000-2017 | 233   | 193.2  | 1259.2 | 767.6  | 2627.8 | 1882.2 |
|                                        | US                  | 2000-2017 | 225   | 221.1  | 1076.8 | 807.1  | 2231.5 | 1593.8 |
| Oceania                                | Australia           | 2000-2018 | 260.3 | 197.3  | 1501.1 | 948    | 2986.9 | 2144.5 |
|                                        | New Zealand         | 2000-2016 | 314.9 | 238    | 1888.5 | 850.6  | 3144.1 | 2344.1 |

**Supplementary Table 2.** Age-standardized YLL rates (per 100,000 males) in 2020.

| Continent | Region                      | Country                          | PYLL/100,000 | 95% CI       |
|-----------|-----------------------------|----------------------------------|--------------|--------------|
| Africa    | Eastern Africa              | Burundi                          | 1,127        | (1093, 1162) |
|           |                             | Comoros                          | 922          | (830, 1022)  |
|           |                             | Ethiopia                         | 302          | (297, 307)   |
|           |                             | Eritrea                          | 309          | (285, 335)   |
|           |                             | Djibouti                         | 346          | (303, 394)   |
|           |                             | Kenya                            | 954          | (939, 969)   |
|           |                             | Madagascar                       | 1,049        | (1031, 1067) |
|           |                             | Malawi                           | 677          | (654, 699)   |
|           |                             | Mauritius                        | 547          | (514, 581)   |
|           |                             | Mozambique                       | 941          | (923, 960)   |
|           |                             | Reunion                          | 621          | (581, 663)   |
|           |                             | Rwanda                           | 1,154        | (1125, 1183) |
|           |                             | Somalia                          | 527          | (510, 545)   |
|           |                             | Zimbabwe                         | 1,258        | (1224, 1292) |
|           |                             | South Sudan                      | 590          | (569, 613)   |
|           |                             | Uganda                           | 1,009        | (989, 1029)  |
|           | United Republic of Tanzania | 843                              | (829, 856)   |              |
|           | Zambia                      | 1,444                            | (1408, 1481) |              |
|           | Middle Africa               | Angola                           | 918          | (899, 938)   |
|           |                             | Cameroon                         | 1,028        | (1008, 1049) |
|           |                             | Central African Republic         | 813          | (769, 860)   |
|           |                             | Chad                             | 723          | (701, 746)   |
|           |                             | Congo                            | 981          | (936, 1027)  |
|           |                             | Democratic Republic of the Congo | 1,157        | (1146, 1169) |
|           |                             | Equatorial Guinea                | 806          | (727, 892)   |
|           |                             | Gabon                            | 594          | (548, 643)   |
|           | Sao Tome and Principe       | 693                              | (520, 904)   |              |
|           | Northern Africa             | Algeria                          | 242          | (238, 247)   |
|           |                             | Libya                            | 242          | (227, 258)   |
|           |                             | Morocco                          | 329          | (323, 336)   |
|           |                             | Sudan                            | 231          | (225, 238)   |
|           |                             | Tunisia                          | 196          | (189, 204)   |
|           |                             | Egypt                            | 188          | (184, 191)   |
|           | Western Africa              | Cabo Verde                       | 950          | (835, 1075)  |
| Benin     |                             | 850                              | (824, 876)   |              |
| Gambia    |                             | 210                              | (180, 244)   |              |
| Ghana     |                             | 685                              | (671, 700)   |              |

|    |      |                                  |       |              |
|----|------|----------------------------------|-------|--------------|
| 1  |      |                                  |       |              |
| 2  |      |                                  |       |              |
| 3  |      |                                  |       |              |
| 4  |      | Guinea                           | 666   | (640, 693)   |
| 5  |      | Côte d'Ivoire                    | 1,071 | (1052, 1091) |
| 6  |      |                                  |       |              |
| 7  |      | Liberia                          | 1,012 | (969, 1056)  |
| 8  |      | Mali                             | 528   | (509, 546)   |
| 9  |      | Mauritania                       | 682   | (645, 720)   |
| 10 |      |                                  |       |              |
| 11 |      | Niger                            | 163   | (154, 171)   |
| 12 |      | Nigeria                          | 924   | (918, 931)   |
| 13 |      | Guinea-Bissau                    | 620   | (556, 690)   |
| 14 |      | Senegal                          | 618   | (598, 638)   |
| 15 |      | Sierra Leone                     | 619   | (590, 649)   |
| 16 |      | Togo                             | 698   | (668, 729)   |
| 17 |      | Burkina Faso                     | 778   | (754, 802)   |
| 18 |      |                                  |       |              |
| 19 |      |                                  |       |              |
| 20 |      | Southern Africa                  |       |              |
| 21 |      | Botswana                         | 669   | (623, 718)   |
| 22 |      | Lesotho                          | 599   | (553, 648)   |
| 23 |      | Namibia                          | 1,022 | (960, 1086)  |
| 24 |      | South Africa                     | 830   | (820, 839)   |
| 25 |      | Eswatini                         | 761   | (679, 851)   |
| 26 | Asia | Central Asia                     |       |              |
| 27 |      | Kazakhstan                       | 324   | (316, 334)   |
| 28 |      | Kyrgyzstan                       | 171   | (158, 185)   |
| 29 |      | Tajikistan                       | 80    | (72, 88)     |
| 30 |      | Turkmenistan                     | 186   | (173, 201)   |
| 31 |      | Uzbekistan                       | 210   | (204, 216)   |
| 32 |      |                                  |       |              |
| 33 |      | Eastern Asia                     |       |              |
| 34 |      | Japan                            | 236   | (234, 237)   |
| 35 |      | Dem. People's Republic of Korea  | 65    | (61, 68)     |
| 36 |      | Republic of Korea                | 183   | (180, 186)   |
| 37 |      | Mongolia                         | 69    | (57, 83)     |
| 38 |      | South-Eastern Asia               |       |              |
| 39 |      | Brunei Darussalam                | 208   | (161, 264)   |
| 40 |      | Myanmar                          | 68    | (65, 71)     |
| 41 |      | Cambodia                         | 90    | (84, 97)     |
| 42 |      | Indonesia                        | 179   | (177, 181)   |
| 43 |      | Lao People's Democratic Republic | 72    | (64, 81)     |
| 44 |      | Malaysia                         | 260   | (255, 266)   |
| 45 |      | Philippines                      | 311   | (306, 315)   |
| 46 |      | Timor-Leste                      | 104   | (82, 129)    |
| 47 |      | Singapore                        | 398   | (386, 411)   |
| 48 |      | Viet Nam                         | 262   | (258, 265)   |
| 49 |      | Thailand                         | 263   | (260, 266)   |
| 50 |      |                                  |       |              |
| 51 |      | Southern Asia                    |       |              |
| 52 |      | Afghanistan                      | 181   | (174, 188)   |
| 53 |      | Bangladesh                       | 100   | (98, 101)    |
| 54 |      | Bhutan                           | 38    | (24, 56)     |
| 55 |      | Sri Lanka                        | 151   | (147, 156)   |
| 56 |      | India                            | 138   | (137, 138)   |
| 57 |      | Iran (Islamic Republic of)       | 396   | (391, 400)   |
| 58 |      | Maldives                         | 196   | (148, 254)   |
| 59 |      |                                  |       |              |
| 60 |      |                                  |       |              |

|    |        |                        |       |              |
|----|--------|------------------------|-------|--------------|
| 1  |        |                        |       |              |
| 2  |        |                        |       |              |
| 3  |        |                        |       |              |
| 4  |        | Nepal                  | 60    | (57, 64)     |
| 5  |        | Pakistan               | 163   | (160, 165)   |
| 6  |        | Western Asia           |       |              |
| 7  |        | Azerbaijan             | 196   | (186, 205)   |
| 8  |        | Bahrain                | 126   | (98, 159)    |
| 9  |        | Armenia                | 786   | (758, 815)   |
| 10 |        | Cyprus                 | 571   | (541, 604)   |
| 11 |        | Georgia                | 594   | (574, 613)   |
| 12 |        | State of Palestine     | 231   | (211, 253)   |
| 13 |        | Iraq                   | 169   | (162, 175)   |
| 14 |        | Israel                 | 388   | (377, 399)   |
| 15 |        | Jordan                 | 177   | (166, 188)   |
| 16 |        | Kuwait                 | 178   | (156, 201)   |
| 17 |        | Lebanon                | 409   | (394, 424)   |
| 18 |        | Oman                   | 379   | (353, 405)   |
| 19 |        | Qatar                  | 247   | (209, 290)   |
| 20 |        | Saudi Arabia           | 76    | (72, 80)     |
| 21 |        | Syrian Arab Republic   | 278   | (268, 288)   |
| 22 |        | United Arab Emirates   | 157   | (142, 174)   |
| 23 |        | Turkey                 | 482   | (477, 486)   |
| 24 |        | Yemen                  | 68    | (64, 73)     |
| 25 |        |                        |       |              |
| 26 |        |                        |       |              |
| 27 |        |                        |       |              |
| 28 |        |                        |       |              |
| 29 | Europe | Eastern Europe         |       |              |
| 30 |        | Bulgaria               | 600   | (588, 613)   |
| 31 |        | Belarus                | 660   | (646, 674)   |
| 32 |        | Czechia                | 559   | (549, 569)   |
| 33 |        | Hungary                | 675   | (663, 687)   |
| 34 |        | Republic of Moldova    | 654   | (633, 677)   |
| 35 |        | Poland                 | 866   | (860, 873)   |
| 36 |        | Romania                | 528   | (521, 536)   |
| 37 |        | Russian Federation     | 654   | (651, 658)   |
| 38 |        | Slovakia               | 967   | (947, 986)   |
| 39 |        | Ukraine                | 562   | (556, 568)   |
| 40 |        |                        |       |              |
| 41 |        |                        |       |              |
| 42 |        | Northern Europe        |       |              |
| 43 |        | Denmark                | 815   | (800, 831)   |
| 44 |        | Estonia                | 1,074 | (1033, 1115) |
| 45 |        | Finland                | 531   | (519, 544)   |
| 46 |        | Iceland                | 702   | (642, 767)   |
| 47 |        | Ireland                | 511   | (496, 526)   |
| 48 |        | Latvia                 | 993   | (960, 1027)  |
| 49 |        | Lithuania              | 986   | (959, 1015)  |
| 50 |        | Norway                 | 697   | (682, 712)   |
| 51 |        | Sweden                 | 733   | (722, 744)   |
| 52 |        | United Kingdom         | 622   | (618, 626)   |
| 53 |        |                        |       |              |
| 54 |        |                        |       |              |
| 55 |        |                        |       |              |
| 56 |        | Southern Europe        |       |              |
| 57 |        | Albania                | 519   | (500, 539)   |
| 58 |        | Bosnia and Herzegovina | 559   | (541, 577)   |
| 59 |        | Croatia                | 655   | (638, 672)   |
| 60 |        | Greece                 | 428   | (420, 436)   |

|    |                                 |                                  |       |              |  |
|----|---------------------------------|----------------------------------|-------|--------------|--|
| 1  |                                 |                                  |       |              |  |
| 2  |                                 |                                  |       |              |  |
| 3  |                                 |                                  |       |              |  |
| 4  |                                 | Italy                            | 313   | (310, 316)   |  |
| 5  |                                 | Malta                            | 479   | (438, 523)   |  |
| 6  |                                 | Montenegro                       | 696   | (648, 747)   |  |
| 7  |                                 | Portugal                         | 517   | (508, 526)   |  |
| 8  |                                 | Serbia                           | 536   | (525, 547)   |  |
| 9  |                                 | Slovenia                         | 721   | (698, 745)   |  |
| 10 |                                 | Spain                            | 390   | (386, 394)   |  |
| 11 |                                 | North Macedonia                  | 708   | (680, 735)   |  |
| 12 |                                 |                                  |       |              |  |
| 13 |                                 |                                  |       |              |  |
| 14 |                                 | Western Europe                   |       |              |  |
| 15 |                                 | Austria                          | 507   | (497, 517)   |  |
| 16 |                                 | Belgium                          | 466   | (458, 475)   |  |
| 17 |                                 | France                           | 442   | (439, 446)   |  |
| 18 |                                 | Germany                          | 585   | (582, 589)   |  |
| 19 |                                 | Luxembourg                       | 449   | (411, 489)   |  |
| 20 |                                 | Netherlands                      | 628   | (620, 635)   |  |
| 21 |                                 | Switzerland                      | 488   | (478, 498)   |  |
| 22 |                                 |                                  |       |              |  |
| 23 | Latin America and the Caribbean | Caribbean                        |       |              |  |
| 24 |                                 | Bahamas                          | 1,665 | (1540, 1798) |  |
| 25 |                                 | Barbados                         | 2,805 | (2665, 2951) |  |
| 26 |                                 | Cuba                             | 1,340 | (1324, 1355) |  |
| 27 |                                 | Dominican Republic               | 1,952 | (1927, 1978) |  |
| 28 |                                 | Guadeloupe                       | 697   | (646, 752)   |  |
| 29 |                                 | Haiti                            | 1,502 | (1474, 1530) |  |
| 30 |                                 | Jamaica                          | 2,079 | (2032, 2126) |  |
| 31 |                                 | Martinique                       | 967   | (903, 1034)  |  |
| 32 |                                 | Puerto Rico                      | 663   | (643, 683)   |  |
| 33 |                                 | Saint Lucia                      | 1,924 | (1761, 2099) |  |
| 34 |                                 | Trinidad and Tobago              | 1,773 | (1716, 1832) |  |
| 35 |                                 |                                  |       |              |  |
| 36 |                                 |                                  |       |              |  |
| 37 |                                 |                                  |       |              |  |
| 38 |                                 |                                  |       |              |  |
| 39 |                                 |                                  |       |              |  |
| 40 |                                 |                                  |       |              |  |
| 41 |                                 |                                  |       |              |  |
| 42 |                                 |                                  |       |              |  |
| 43 |                                 |                                  |       |              |  |
| 44 |                                 |                                  |       |              |  |
| 45 |                                 | Central America                  |       |              |  |
| 46 |                                 | Belize                           | 1,155 | (1035, 1285) |  |
| 47 |                                 | Costa Rica                       | 541   | (524, 559)   |  |
| 48 |                                 | El Salvador                      | 361   | (346, 376)   |  |
| 49 |                                 | Guatemala                        | 630   | (615, 645)   |  |
| 50 |                                 | Honduras                         | 937   | (913, 961)   |  |
| 51 |                                 | Mexico                           | 559   | (555, 564)   |  |
| 52 |                                 | Nicaragua                        | 577   | (555, 599)   |  |
| 53 |                                 | Panama                           | 852   | (827, 879)   |  |
| 54 |                                 |                                  |       |              |  |
| 55 |                                 |                                  |       |              |  |
| 56 |                                 | South America                    |       |              |  |
| 57 |                                 | Argentina                        | 570   | (564, 576)   |  |
| 58 |                                 | Bolivia (Plurinational State of) | 584   | (570, 599)   |  |
| 59 |                                 | Brazil                           | 714   | (711, 718)   |  |
| 60 |                                 | Chile                            | 724   | (714, 734)   |  |

|               |                       |                                    |       |              |
|---------------|-----------------------|------------------------------------|-------|--------------|
|               |                       | Colombia                           | 649   | (643, 656)   |
|               |                       | Ecuador                            | 610   | (599, 621)   |
|               |                       | French Guiana                      | 989   | (858, 1135)  |
|               |                       | Guyana                             | 1,185 | (1110, 1265) |
|               |                       | Paraguay                           | 893   | (870, 916)   |
|               |                       | Peru                               | 534   | (527, 541)   |
|               |                       | Suriname                           | 994   | (911, 1083)  |
|               |                       | Uruguay                            | 835   | (811, 859)   |
|               |                       | Venezuela (Bolivarian Republic of) | 1,076 | (1064, 1088) |
| Oceania       | Australia/New Zealand | Australia                          | 535   | (529, 542)   |
|               |                       | New Zealand                        | 684   | (667, 701)   |
|               | Melanesia             | Solomon Islands                    | 832   | (740, 931)   |
|               |                       | Fiji                               | 515   | (462, 573)   |
|               |                       | New Caledonia                      | 440   | (371, 519)   |
|               |                       | Vanuatu                            | 251   | (177, 345)   |
|               |                       | Papua New Guinea                   | 607   | (583, 632)   |
|               | Micronesia            | Guam                               | 673   | (571, 788)   |
|               | Polynesia             | French Polynesia                   | 1,271 | (1156, 1394) |
|               | Polynesia             | Samoa                              | 504   | (391, 640)   |
| North America |                       | Canada                             | 474   | (469, 479)   |
|               |                       | United States of America           | 485   | (483, 487)   |
